# Supplementary material for: Complementary Roles of the Hippocampus and the Dorsomedial Striatum during Spatial and Sequence-Based Navigation Behavior
Source: PubMed Central journal article supplement (PMC3695082; doi:10.1371/journal.pone.0067232), 2013-06-27
Supplement: pone.0067232.s001.pdf [file pone.0067232.s001.pdf]

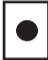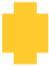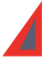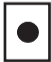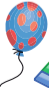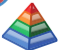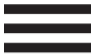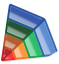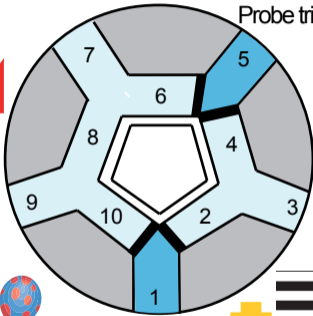

Probe trial

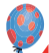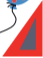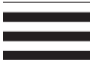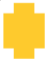

Training
