# Supplementary material for: Complementary Roles of the Hippocampus and the Dorsomedial Striatum during Spatial and Sequence-Based Navigation Behavior
Source: PubMed Central journal article supplement (PMC3695082; doi:10.1371/journal.pone.0067232), 2013-06-27
Supplement: pone.0067232.s002.pdf [file pone.0067232.s002.pdf]

**A**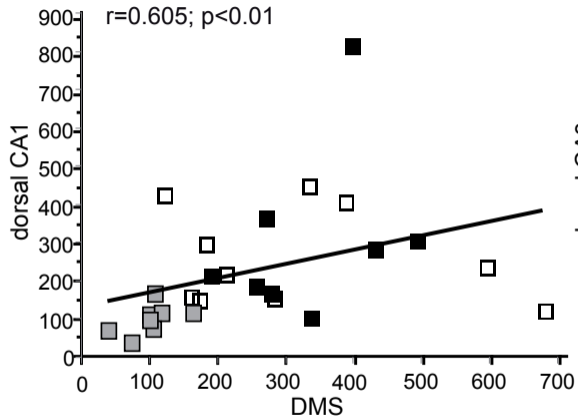**B**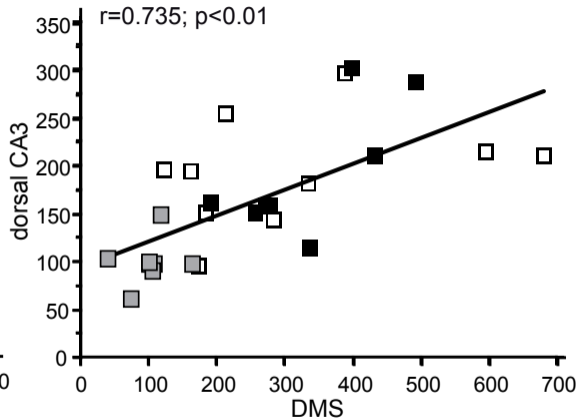

■ Allocentric (n=7)

□ Sequential egocentric (n=9)

■ Swimming controls (n=8)
