# Supplementary material for: Complementary Roles of the Hippocampus and the Dorsomedial Striatum during Spatial and Sequence-Based Navigation Behavior
Source: PubMed Central journal article supplement (PMC3695082; doi:10.1371/journal.pone.0067232), 2013-06-27
Supplement: pone.0067232.s004.pdf [file pone.0067232.s004.pdf]

| <b>Path</b>                                  | <b>Intersection I<br/>turn score</b> | <b>Intersection II<br/>turn score</b> | <b>Intersection III<br/>turn score</b> | <b>Direct path<br/>score</b> |
|----------------------------------------------|--------------------------------------|---------------------------------------|----------------------------------------|------------------------------|
| <b>1-10-8-7<br/>(Direct path)</b>            | 100/1                                | 100/1                                 | 100/1                                  | <b>100</b>                   |
| <b>1-10-8-6-7</b>                            | 100/1                                | 100/1                                 | 0                                      | <b>66.7</b>                  |
| <b>1-10-9-8-7<br/>(Left serial path)</b>     | 100/1                                | 0                                     | 100/2                                  | <b>50</b>                    |
| <b>1-2-10-9-8-7</b>                          | 0                                    | 0                                     | 100/2                                  | <b>16.7</b>                  |
| <b>1-2-4-6-7<br/>(Long path)</b>             | 0                                    | -                                     | -                                      | <b>0</b>                     |
| <b>1-2-3-4-5-6-7<br/>(Right serial path)</b> | 0                                    | -                                     | -                                      | <b>0</b>                     |
